# Supplementary material for: Identification of Gene Modules Associated with Drought Response in Rice by Network-Based Analysis
Source: PLoS One. 2012 May 25;7(5):e33748. doi: 10.1371/journal.pone.0033748 (PMC3360736; doi:10.1371/journal.pone.0033748)
Supplement: Table S2 — Gene modules detected by MCL in the drought responsive network. (XLS) [file pone.0033748.s002.xls]

## Sheet: Table S2
Table S2. Gene modules detected by MCL in drought responsive network.
Module	MSU locus	Description
Module 1	LOC_Os01g62110.1	expressed protein
	LOC_Os01g15810.1	peroxidase precursor
	LOC_Os05g15630.1	membrane associated DUF588 domain containing protein
	LOC_Os03g45920.1	tubulin/FtsZ domain containing protein
	LOC_Os08g06100.1	O-methyltransferase
	LOC_Os11g26860.1	serine hydroxymethyltransferase
	LOC_Os01g65680.1	4,5-DOPA dioxygenase extradiol
	LOC_Os02g33550.1	harpin-induced protein 1 domain containing protein
	LOC_Os05g27090.1	basic helix-loop-helix domain containing protein
	LOC_Os07g18750.1	LTPL42 - Protease inhibitor/seed storage/LTP family protein precursor
	LOC_Os10g31660.1	glycine-rich cell wall structural protein 2 precursor
	LOC_Os05g04490.1	peroxidase precursor
	LOC_Os04g50950.1	peptide transporter PTR2
	LOC_Os01g15830.1	peroxidase precursor
	LOC_Os08g13920.1	glycosyl hydrolases family 16
	LOC_Os11g42960.1	integral membrane protein TIGR01569 containing protein
	LOC_Os06g47700.1	serine/threonine-protein kinase BRI1-like 2 precursor
	LOC_Os03g12290.1	glutamine synthetase
	LOC_Os11g35350.1	expressed protein
	LOC_Os03g22020.1	peroxidase precursor
	LOC_Os10g38360.1	glutathione S-transferase
	LOC_Os09g25290.1	methyladenine glycosylase
	LOC_Os03g36560.1	peroxidase precursor
	LOC_Os03g02939.1	peroxidase precursor
	LOC_Os05g35460.1	patellin protein
	LOC_Os05g41990.1	peroxidase precursor
	LOC_Os08g24790.1	AIR12
	LOC_Os10g02070.1	peroxidase precursor
	LOC_Os02g37160.1	heavy metal transport/detoxification protein
	LOC_Os03g13210.1	peroxidase precursor
	LOC_Os12g13380.1	adenylate kinase
	LOC_Os02g41780.1	transporter-related
	LOC_Os04g37550.1	aspartic proteinase nepenthesin-2 precursor
	LOC_Os03g01700.1	expressed protein
	LOC_Os01g59570.1	senescence-induced receptor-like serine/threonine-protein kinase precursor
	LOC_Os06g44280.1	retrotransposon protein
	LOC_Os01g58910.1	auxin-induced protein 5NG4
	LOC_Os01g05064.1	expressed protein
	LOC_Os01g40870.1	aldehyde dehydrogenase
	LOC_Os07g01410.1	peroxidase precursor
	LOC_Os02g55870.1	heparanase-like protein precursor
	LOC_Os01g42880.1	transferase family protein
	LOC_Os10g31720.1	glycine-rich cell wall structural protein 2 precursor
	LOC_Os08g09010.1	Cupin domain containing protein
	LOC_Os01g72140.1	glutathione S-transferase
	LOC_Os05g51780.1	zinc finger
	LOC_Os10g40620.1	expressed protein
	LOC_Os09g25490.1	CESA9 - cellulose synthase
	LOC_Os04g46940.1	copper-transporting ATPase 3
	LOC_Os11g04020.1	major facilitator superfamily antiporter
	LOC_Os08g09060.1	Cupin domain containing protein
	LOC_Os10g40710.1	expansin precursor
	LOC_Os08g32170.1	oxidoreductase
	LOC_Os09g28720.1	alpha/beta hydrolase fold
	LOC_Os04g58570.1	C2 domain containing protein
	LOC_Os03g58110.1	uncharacterized protein At4g06744 precursor
	LOC_Os05g39560.1	metal cation transporter
	LOC_Os08g15060.1	ATP binding protein
	LOC_Os01g68580.1	LTPL38 - Protease inhibitor/seed storage/LTP family protein precursor
	LOC_Os03g12900.4	squalene monooxygenase
	LOC_Os01g48800.1	purine permease
	LOC_Os01g10320.1	class III HD-Zip protein 8
	LOC_Os06g22290.1	legume lectins beta domain containing protein
	LOC_Os01g67390.1	POEI32 - Pollen Ole e I allergen and extensin family protein precursor
	LOC_Os03g25330.1	peroxidase precursor
	LOC_Os08g06320.1	DNA binding protein
	LOC_Os07g45080.1	expressed protein
	LOC_Os01g20160.1	OsHKT1;5 - Na+ transporter
	LOC_Os04g13140.1	vignain precursor
	LOC_Os06g50340.1	receptor protein kinase CLAVATA1 precursor
	LOC_Os01g53260.1	OsWRKY23 - Superfamily of TFs having WRKY and zinc finger domains
	LOC_Os11g47840.1	OsRhmbd18 - Putative Rhomboid homologue
	LOC_Os01g65510.1	OsFBX31 - F-box domain containing protein
	LOC_Os01g67090.1	IQ calmodulin-binding motif domain containing protein
	LOC_Os10g32980.1	CESA7 - cellulose synthase
	LOC_Os10g32700.1	hypersensitive-induced response protein
	LOC_Os03g55410.1	peroxidase precursor
	LOC_Os03g13520.1	endonuclease/exonuclease/phosphatase family domain containing protein
	LOC_Os01g06220.1	gibberellin receptor GID1L2
	LOC_Os10g33810.1	myb-related protein Myb4
	LOC_Os01g61160.1	laccase precursor protein
	LOC_Os01g52160.1	heavy metal-associated domain containing protein
	LOC_Os05g41540.1	bZIP transcription factor domain containing protein
	LOC_Os02g01220.1	rhodanese-like domain containing protein
	LOC_Os01g60930.1	expressed protein
	LOC_Os01g08090.1	flavonol-3-O-glycoside-7-O-glucosyltransferase 1
	LOC_Os01g61940.1	white-brown complex homolog protein
	LOC_Os01g18744.1	transferase family protein
	LOC_Os01g50820.1	transporter
	LOC_Os01g27390.1	glutathione S-transferase
	LOC_Os07g04960.1	app1
	LOC_Os12g41690.1	membrane associated DUF588 domain containing protein
	LOC_Os02g43660.1	plastocyanin-like domain containing protein
	LOC_Os01g72740.1	cytochrome P450
	LOC_Os11g03290.1	nucleoside-triphosphatase
	LOC_Os01g45720.1	expressed protein
	LOC_Os09g29660.1	white-brown complex homolog protein 11
	LOC_Os02g20850.1	ras-related protein
	LOC_Os10g39980.1	expressed protein
	LOC_Os10g17650.1	Os10bglu34 - beta-glucosidase homologue
	LOC_Os10g30290.1	GDSL-like lipase/acylhydrolase
	LOC_Os10g01640.1	decarboxylase
	LOC_Os10g08319.1	cytochrome P450
	LOC_Os04g46810.1	LTPL120 - Protease inhibitor/seed storage/LTP family protein precursor
	LOC_Os02g48450.1	xylem cysteine proteinase 2 precursor
	LOC_Os03g13390.2	oxidoreductase
	LOC_Os01g24560.1	fruit bromelain precursor
	LOC_Os05g19910.1	transferase family protein
	LOC_Os05g06970.1	peroxidase precursor
	LOC_Os01g15340.1	flowering promoting factor-like 1
	LOC_Os09g29820.1	bZIP transcription factor domain containing protein
	LOC_Os11g05480.1	transcription factor
	LOC_Os04g32840.1	formin-like protein 20
	LOC_Os02g35490.1	MLO domain containing protein
	LOC_Os07g48260.1	OsWRKY47 - Superfamily of TFs having WRKY and zinc finger domains
	LOC_Os08g44620.1	zinc-binding protein
	LOC_Os01g63540.1	cytochrome P450
	LOC_Os09g07350.1	fasciclin-like arabinogalactan protein 8 precursor
	LOC_Os03g18890.1	glycosyl transferase 8 domain containing protein
	LOC_Os04g37990.1	transporter family protein
	LOC_Os02g57560.1	tyrosine protein kinase domain containing protein
	LOC_Os04g45860.1	transposon protein
	LOC_Os08g05520.1	myb-like DNA-binding domain containing protein
	LOC_Os04g50920.1	OsWRKY37 - Superfamily of TFs having WRKY and zinc finger domains
	LOC_Os03g20210.1	aspartic proteinase nepenthesin precursor
	LOC_Os02g36414.1	transporter family protein
	LOC_Os07g23944.1	glycosyl hydrolase
	LOC_Os06g36450.1	ferroportin1 domain containing protein
	LOC_Os12g44190.1	ATPase 3
	LOC_Os02g47780.1	hydrolase
	LOC_Os03g02190.1	protein kinase domain containing protein
	LOC_Os09g12230.1	ubiquitin-conjugating enzyme
	LOC_Os11g04350.1	cell death associated protein
	LOC_Os01g47635.1	expressed protein
	LOC_Os02g53870.1	expressed protein
	LOC_Os02g54180.1	expressed protein
	LOC_Os06g37750.1	S-locus-like receptor protein kinase
	LOC_Os11g11780.1	cysteine-rich receptor-like protein kinase 21 precursor
	LOC_Os03g42630.1	No apical meristem protein
	LOC_Os07g40910.1	expressed protein
	LOC_Os08g44830.1	ZOS8-14 - C2H2 zinc finger protein
	LOC_Os12g39220.1	ZOS12-08 - C2H2 zinc finger protein
	LOC_Os06g11720.1	cytokinin-O-glucosyltransferase 2
	LOC_Os02g09850.1	expressed protein
	LOC_Os05g28780.1	GCRP10 - Glycine and cysteine rich family protein precursor
	LOC_Os07g40300.1	ZOS7-10 - C2H2 zinc finger protein
	LOC_Os06g38950.1	ABC transporter
	LOC_Os02g16540.2	OsWRKY39v2 - Superfamily of TFs having WRKY and zinc finger domains
	LOC_Os09g34320.1	expressed protein
	LOC_Os02g41890.1	phytosulfokine receptor precursor
	LOC_Os04g51560.1	OsWRKY68 - Superfamily of TFs having WRKY and zinc finger domains
	LOC_Os09g30486.1	fasciclin domain containing protein
	LOC_Os04g03980.1	flavin monooxygenase
	LOC_Os08g02110.1	peroxidase precursor
	LOC_Os08g14760.1	AMP-binding domain containing protein
	LOC_Os03g52720.1	magnesium-dependent phosphatase 1
	LOC_Os04g09920.1	cytochrome P450
	LOC_Os07g23430.1	fatty acid desaturase
	LOC_Os12g43660.1	receptor-like protein kinase HAIKU2 precursor
	LOC_Os11g37700.1	pleiotropic drug resistance protein
	LOC_Os03g42830.1	MATE efflux family protein
	LOC_Os02g47060.1	OsWRKY66 - Superfamily of TFs having WRKY and zinc finger domains
	LOC_Os02g52930.1	integral membrane protein DUF6 containing protein
	LOC_Os02g01890.1	cytochrome P450
	LOC_Os12g05680.1	transcription factor
	LOC_Os05g48850.1	no apical meristem protein
	LOC_Os03g64130.1	avr9/Cf-9 rapidly elicited protein
	LOC_Os04g56420.1	retrotransposon protein
	LOC_Os02g03900.1	metal transporter Nramp6
	LOC_Os12g10330.1	NB-ARC domain containing protein
	LOC_Os12g02760.1	DUF567 domain containing protein
	LOC_Os03g40830.1	OsSub30 - Putative Subtilisin homologue
	LOC_Os09g31210.1	AGC_PVPK_like_CDK8.1 - ACG kinases include homologs to PKA
	LOC_Os04g33860.1	expressed protein
	LOC_Os01g42200.1	expressed protein
	LOC_Os08g44220.1	GLTP domain containing protein
	LOC_Os05g49840.1	phospholipase
	LOC_Os12g38810.1	expressed protein
	LOC_Os08g16050.1	tetraspanin family protein
	LOC_Os11g05820.1	transposon protein
	LOC_Os06g04540.1	DNA binding protein
	LOC_Os07g47760.1	POEI50 - Pollen Ole e I allergen and extensin family protein precursor
	LOC_Os04g57130.1	dirigent-like protein pDIR17
	LOC_Os04g42040.1	expressed protein
	LOC_Os05g48010.1	MYB family transcription factor
	LOC_Os05g36310.1	zinc finger
	LOC_Os04g37980.1	transporter family protein
	LOC_Os12g10740.1	leucine-rich repeat family protein
	LOC_Os06g14630.1	GDSL-like lipase/acylhydrolase
	LOC_Os08g36540.1	aspartic proteinase nepenthesin-1 precursor
	LOC_Os05g20930.1	ZOS5-07 - C2H2 zinc finger protein
	LOC_Os03g09980.1	sulfate transporter
	LOC_Os05g07280.1	expressed protein
	LOC_Os02g37380.1	expressed protein
	LOC_Os12g01480.1	phosphatidate cytidylyltransferase
	LOC_Os12g24490.1	zinc finger
	LOC_Os01g56030.1	EF hand family protein
	LOC_Os03g57410.1	RING-H2 finger protein ATL5D
	LOC_Os09g13890.1	calmodulin binding protein
	LOC_Os11g36400.1	expressed protein
	LOC_Os06g34430.1	zinc finger protein
	LOC_Os09g27510.1	cytochrome P450
	LOC_Os11g14910.1	NADP-dependent oxidoreductase
	LOC_Os05g41420.1	auxin-induced protein 5NG4
	LOC_Os08g01950.1	transferase family protein
	LOC_Os12g26960.1	THION34 - Plant thionin family protein precursor
	LOC_Os03g22170.1	AP2 domain containing protein
	LOC_Os01g64490.1	protein kinase domain containing protein
	LOC_Os12g04150.1	alpha/beta hydrolase fold
	LOC_Os12g44230.2	expressed protein
	LOC_Os06g32990.1	peroxidase precursor
	LOC_Os03g03600.1	fasciclin-like arabinogalactan protein
	LOC_Os09g23530.1	dehydrogenase
	LOC_Os12g28590.1	ATPase 2
	LOC_Os04g11030.1	expressed protein
	LOC_Os07g43670.1	ribonuclease T2 family domain containing protein
	LOC_Os02g56510.1	phosphate transporter 1
	LOC_Os01g74110.1	metal cation transporter
	LOC_Os10g40510.1	LTPL144 - Protease inhibitor/seed storage/LTP family protein precursor
	LOC_Os02g51110.1	aquaporin protein
	LOC_Os02g12690.1	cytochrome P450
	LOC_Os05g01810.1	xylem cysteine proteinase 2 precursor
	LOC_Os02g37190.1	expressed protein
	LOC_Os08g38560.1	receptor-like protein kinase 2 precursor
	LOC_Os07g01660.1	dirigent
	LOC_Os04g44510.1	GEM
	LOC_Os04g45970.1	glutamate dehydrogenase protein
	LOC_Os02g30810.1	OsSAUR10 - Auxin-responsive SAUR gene family member
	LOC_Os03g43650.1	uncharacterized protein At4g06744 precursor
	LOC_Os07g04930.1	retrotransposon protein
	LOC_Os06g09350.1	expressed protein
	LOC_Os07g35510.1	glucan endo-1,3-beta-glucosidase precursor
	LOC_Os06g05080.1	cytochrome c oxidase subunit 5B
	LOC_Os03g49270.1	THION36 - Plant thionin family protein precursor
	LOC_Os02g20360.1	tyrosine aminotransferase
	LOC_Os07g26630.1	aquaporin protein
	LOC_Os03g18140.1	expressed protein
	LOC_Os01g24550.1	fruit bromelain precursor
	LOC_Os10g38880.1	DUF623 domain containing protein
	LOC_Os02g09359.1	BRASSINOSTEROID INSENSITIVE 1-associated receptor kinase 1 precursor
	LOC_Os03g02040.1	remorin
	LOC_Os02g09490.1	dehydrogenase
	LOC_Os08g34280.1	cinnamoyl-CoA reductase
	LOC_Os02g42440.1	GEM
	LOC_Os02g40730.1	ammonium transporter protein
	LOC_Os05g29710.1	RING-H2 finger protein
	LOC_Os11g07670.1	dirigent
	LOC_Os10g31680.1	glycine-rich cell wall structural protein 2 precursor
	LOC_Os02g44310.1	LTPL112 - Protease inhibitor/seed storage/LTP family protein precursor
	LOC_Os07g07920.1	LTPL100 - Protease inhibitor/seed storage/LTP family protein precursor
	LOC_Os10g11500.1	SCP-like extracellular protein
	LOC_Os01g62490.1	laccase precursor protein
	LOC_Os07g47460.1	expressed protein
	LOC_Os11g38010.1	targeting protein for Xklp2
	LOC_Os03g46454.1	metal cation transporter
	LOC_Os10g31500.1	retrotransposon protein
	LOC_Os02g37260.1	hypothetical protein
	LOC_Os02g40710.1	ammonium transporter protein
	LOC_Os02g48210.1	lectin-like protein kinase
	LOC_Os03g46180.1	LTPL71 - Protease inhibitor/seed storage/LTP family protein precursor
	LOC_Os04g11060.1	expressed protein
	LOC_Os05g48730.1	hypothetical protein
	LOC_Os07g34850.1	aspartic proteinase nepenthesin
	LOC_Os08g41210.4	expressed protein
	LOC_Os03g05570.1	RING-H2 finger protein ATL3F
	LOC_Os09g20500.1	transporter
	LOC_Os09g24370.1	expressed protein
	LOC_Os11g35040.1	aminotransferase
	LOC_Os12g40330.1	expressed protein
	LOC_Os01g18970.1	peroxidase precursor
	LOC_Os01g45140.1	anthocyanin 3-O-beta-glucosyltransferase
	LOC_Os02g54570.1	SCP-like extracellular protein
	LOC_Os02g50000.1	GDSL-like lipase/acylhydrolase
	LOC_Os02g43770.1	DUF630/DUF632 domains containing protein
	LOC_Os04g11040.1	expressed protein
	LOC_Os04g32830.1	expressed protein
	LOC_Os04g50030.1	DNA binding protein
	LOC_Os05g14220.1	tyrosine protein kinase domain containing protein
	LOC_Os05g16930.1	protein kinase domain containing protein
	LOC_Os05g09480.1	OsIAA16 - Auxin-responsive Aux/IAA gene family member
	LOC_Os06g35060.1	heavy metal-associated domain containing protein
	LOC_Os08g01710.1	GLTP domain containing protein
	LOC_Os02g45890.1	sulfotransferase domain containing protein
	LOC_Os09g33830.1	solute carrier family 35 member F1
	LOC_Os09g39070.1	thiol protease SEN102 precursor
	LOC_Os11g07770.1	dirigent
	LOC_Os11g05800.1	HVA22
	LOC_Os11g20160.1	O-methyltransferase
	LOC_Os11g31090.1	transferase family protein
	LOC_Os11g38780.1	EF hand family protein
	LOC_Os12g04320.1	sulfotransferase domain containing protein
	LOC_Os12g38290.1	metallothionein
	LOC_Os04g53560.1	expressed protein
	LOC_Os05g12280.1	clumping factor A precursor
	LOC_Os07g36750.1	CSLF3 - cellulose synthase-like family F; beta1,3;1,4 glucan synthase
	LOC_Os09g16090.1	UDP-glucoronosyl/UDP-glucosyl transferase
	LOC_Os09g12240.1	serine/threonine-protein kinase BRI1-like 1 precursor
	LOC_Os09g26170.1	MYB family transcription factor
	LOC_Os11g24140.1	plastocyanin-like domain containing protein
	LOC_Os12g38051.1	metallothionein
	LOC_Os12g38010.1	metallothionein
	LOC_Os01g44130.1	aspartic proteinase oryzasin-1 precursor
	LOC_Os01g59580.1	retrotransposon protein
Module 2	LOC_Os05g22614.3	PTAC16
	LOC_Os08g34220.1	omega-6 fatty acid desaturase
	LOC_Os03g21900.1	uroporphyrinogen decarboxylase
	LOC_Os10g35840.1	shikimate/quinate 5-dehydrogenase
	LOC_Os12g01449.1	chloroplast unusual positioning protein
	LOC_Os03g59320.1	expressed protein
	LOC_Os01g58640.1	nucleotide pyrophosphatase/phosphodiesterase
	LOC_Os09g38090.1	expressed protein
	LOC_Os12g32760.1	transporter family protein
	LOC_Os03g14915.1	expressed protein
	LOC_Os03g54130.1	cysteine protease 1 precursor
	LOC_Os07g06660.1	glyoxalase family protein
	LOC_Os04g48390.1	uncharacterized membrane protein
	LOC_Os06g21380.1	OsCttP3 - Putative C-terminal processing peptidase homologue
	LOC_Os05g01530.1	expressed protein
	LOC_Os01g60830.1	expressed protein
	LOC_Os02g04510.1	UOS1
	LOC_Os09g20240.2	DUF581 domain containing protein
	LOC_Os12g33120.1	expressed protein
	LOC_Os03g07360.1	expressed protein
	LOC_Os07g42730.1	EF hand family protein
	LOC_Os04g45810.1	homeobox associated leucine zipper
	LOC_Os04g41340.1	4-nitrophenylphosphatase
	LOC_Os07g32880.1	ATP synthase gamma chain
	LOC_Os04g33830.1	membrane protein
	LOC_Os08g32120.1	expressed protein
	LOC_Os03g58090.1	expressed protein
	LOC_Os04g16680.1	fructose-1,6-bisphosphatase
	LOC_Os07g37240.1	chlorophyll A-B binding protein
	LOC_Os07g04840.1	PsbP
	LOC_Os04g36720.1	ferric-chelate reductase
	LOC_Os08g29170.1	dehydrogenase
	LOC_Os09g36930.1	aquaporin protein
	LOC_Os11g02424.1	LTPL9 - Protease inhibitor/seed storage/LTP family protein precursor
	LOC_Os03g19240.1	AMP-binding enzyme
	LOC_Os03g56930.1	app1
	LOC_Os03g01920.1	expressed protein
	LOC_Os09g28310.1	bZIP transcription factor
	LOC_Os02g10120.1	lipoxygenase
	LOC_Os12g44370.1	expressed protein
	LOC_Os05g07860.1	uvrB/uvrC motif family protein
	LOC_Os02g15750.1	expressed protein
	LOC_Os05g06920.1	relA-SpoT like protein RSH4
	LOC_Os03g03990.1	signal recognition particle 43 kDa protein
	LOC_Os01g26039.1	expressed protein
	LOC_Os12g38170.1	osmotin
	LOC_Os01g69060.1	hydrolase
	LOC_Os01g69070.1	auxin efflux carrier component
	LOC_Os03g50310.1	CCT/B-box zinc finger protein
	LOC_Os09g10750.1	rhodanese-like
	LOC_Os02g39600.1	outer envelope protein
	LOC_Os02g38240.1	rhodanese family protein
	LOC_Os03g01570.1	expressed protein
	LOC_Os02g39930.1	OsTIL-1 Temperature-induced lipocalin-1
	LOC_Os03g21560.1	photosystem II 11 kD protein
	LOC_Os03g52460.1	glucose-1-phosphate adenylyltransferase large subunit
	LOC_Os11g41710.1	cytochrome P450
	LOC_Os06g49520.1	arogenate dehydrogenase 1
	LOC_Os04g53230.1	aminomethyltransferase
	LOC_Os04g50860.1	expressed protein
	LOC_Os12g25490.1	O-methyltransferase
	LOC_Os04g56710.1	GTP cyclohydrolase I 1
	LOC_Os06g49160.1	thylakoid lumenal 16.5 kDa protein
	LOC_Os04g56230.1	polyprenyl synthetase
	LOC_Os07g36190.1	hydrolase
	LOC_Os12g07810.1	aldehyde dehydrogenase
	LOC_Os03g27120.1	ICE-like protease p20 domain containing protein
	LOC_Os02g32780.1	pentatricopeptide
	LOC_Os09g27900.1	plastidic glucose transporter 1
	LOC_Os04g57500.1	phosphatidate cytidylyltransferase
	LOC_Os07g07540.1	SHOOT1 protein
	LOC_Os03g24860.1	transporter family protein
	LOC_Os09g37620.1	flavin-containing monooxygenase family protein
	LOC_Os01g72460.1	NADPH quinone oxidoreductase
	LOC_Os03g56280.1	lactate/malate dehydrogenase
	LOC_Os01g12210.1	aluminum-activated malate transporter
	LOC_Os06g04920.2	zinc finger family protein
	LOC_Os06g01972.1	auxin-induced protein 5NG4
	LOC_Os01g61120.1	expressed protein
	LOC_Os11g39640.1	zinc finger
	LOC_Os07g08290.1	expressed protein
	LOC_Os01g52170.1	expressed protein
	LOC_Os07g43560.1	TKL_IRAK_DUF26-lc.24 - DUF26 kinases have homology to DUF26 containing loci
	LOC_Os08g14450.1	RNA polymerase sigma factor
	LOC_Os07g37230.1	inositol-1-monophosphatase
	LOC_Os01g48874.1	wax synthase
	LOC_Os05g07870.1	triose phosphate/phosphate translocator
	LOC_Os07g01030.1	glycosyl transferase
	LOC_Os09g36240.1	deoxyribodipyrimidine photolyase family protein
	LOC_Os02g47510.1	9-cis-epoxycarotenoid dioxygenase 1
	LOC_Os04g54790.1	ELMO/CED-12 family protein
	LOC_Os01g37460.1	zinc finger family protein
	LOC_Os01g12740.1	cytochrome P450
	LOC_Os02g51820.1	expressed protein
	LOC_Os03g50070.1	DUF1295 domain containing protein
	LOC_Os02g08150.1	CCT/B-box zinc finger protein
	LOC_Os06g01620.1	scarecrow
	LOC_Os02g51020.1	expressed protein
	LOC_Os01g03310.1	BBTI1 - Bowman-Birk type bran trypsin inhibitor precursor
	LOC_Os01g53330.1	anthocyanidin 5,3-O-glucosyltransferase
	LOC_Os06g47940.1	nifU
	LOC_Os06g24070.1	myb-like DNA-binding domain containing protein
	LOC_Os02g14840.1	potassium channel KAT1
	LOC_Os08g06630.1	RNA polymerase sigma factor
	LOC_Os02g39360.1	B-box zinc finger family protein
	LOC_Os01g02080.1	peptidyl-prolyl cis-trans isomerase
	LOC_Os02g45460.1	expressed protein
	LOC_Os04g02880.1	expressed protein
	LOC_Os07g38960.2	chlorophyll A-B binding protein
	LOC_Os11g42510.2	tyrosine aminotransferase
	LOC_Os01g20830.1	heavy metal-associated domain containing protein
	LOC_Os06g15330.1	CCT/B-box zinc finger protein
	LOC_Os12g43340.1	actin-depolymerizing factor
	LOC_Os04g44924.1	short-chain dehydrogenase/reductase
	LOC_Os03g60639.1	expressed protein
	LOC_Os03g03670.1	expressed protein
	LOC_Os02g09940.1	peroxiredoxin
	LOC_Os06g21110.1	expressed protein
	LOC_Os02g47020.1	phosphoribulokinase/Uridine kinase family protein
	LOC_Os07g25430.1	photosystem I reaction center subunit IV A
	LOC_Os04g42020.1	CCT/B-box zinc finger protein
	LOC_Os06g05120.2	expressed protein
	LOC_Os10g05130.1	expressed protein
	LOC_Os10g42180.1	aluminum-activated malate transporter
	LOC_Os03g59090.1	retrotransposon protein
	LOC_Os12g34890.1	acyl carrier protein
	LOC_Os07g18874.1	white-brown complex homolog protein 11
	LOC_Os01g53020.1	heat shock protein DnaJ
	LOC_Os07g08030.1	ribose-5-phosphate isomerase A
	LOC_Os04g33610.1	expressed protein
	LOC_Os08g07740.1	histone-like transcription factor and archaeal histone
	LOC_Os10g37770.1	dehydration response related protein
	LOC_Os01g03549.1	multi-copper oxidase type I family protein
	LOC_Os11g03580.1	expressed protein
	LOC_Os03g27040.1	heavy metal-associated domain containing protein
	LOC_Os08g02630.1	photosystem II core complex proteins psbY
	LOC_Os02g57020.1	YCF37
	LOC_Os07g46330.1	uncharacterized UPF0114 domain containing protein
	LOC_Os03g11250.1	expressed protein
	LOC_Os06g12660.1	NHL repeat-containing protein
	LOC_Os05g43310.1	photosystem II reaction center W protein
	LOC_Os05g33280.1	thylakoid lumen protein
	LOC_Os11g01590.1	nodulin
	LOC_Os06g02960.1	expressed protein
	LOC_Os06g02940.1	expressed protein
	LOC_Os07g38230.1	expressed protein
	LOC_Os06g29790.1	phosphate transporter 1
	LOC_Os05g44420.1	expressed protein
	LOC_Os04g40530.1	methyltransferase domain containing protein
	LOC_Os02g37600.2	expressed protein
	LOC_Os06g03560.1	oligopeptide transporter
	LOC_Os06g42850.1	extracellular ligand-gated ion channel
	LOC_Os12g43810.1	expressed protein
	LOC_Os08g19140.1	adenylate kinase family protein
	LOC_Os09g30510.1	glucosyl transferase
	LOC_Os02g42940.1	MSP domain containing protein
	LOC_Os02g02000.1	cytochrome P450
	LOC_Os08g31510.1	DUF581 domain containing protein
	LOC_Os10g14870.1	heavy metal-associated domain containing protein
	LOC_Os07g13969.1	expressed protein
	LOC_Os12g13940.1	DNA-binding storekeeper protein-related
	LOC_Os11g05550.1	expressed protein
	LOC_Os05g39800.1	NFD4
	LOC_Os01g01160.1	heat shock protein DnaJ
	LOC_Os08g37940.1	HAD-superfamily hydrolase subfamily IA
	LOC_Os12g07210.1	expressed protein
	LOC_Os08g34984.1	DUF581 domain containing protein
	LOC_Os06g35160.1	CAMK_KIN1/SNF1/Nim1_like.26 - CAMK includes calcium/calmodulin depedent protein kinases
	LOC_Os06g30930.1	expressed protein
	LOC_Os03g22370.1	ultraviolet-B-repressible protein
	LOC_Os11g16550.1	uncharacterized protein ycf53
	LOC_Os12g34880.1	expressed protein
	LOC_Os01g66980.2	expressed protein
	LOC_Os04g56240.1	lipase
	LOC_Os06g15400.1	expressed protein
	LOC_Os02g49680.1	arsenate reductase
	LOC_Os04g55800.1	sulfate transporter
	LOC_Os03g63480.1	ankyrin repeat domain containing protein
	LOC_Os08g06530.1	rubredoxin family protein
	LOC_Os08g44680.1	photosystem I reaction center subunit II
	LOC_Os10g10180.3	methyltransferase domain containing protein
	LOC_Os05g51070.1	inactive receptor kinase At2g26730 precursor
	LOC_Os10g37180.1	glycine cleavage system H protein
	LOC_Os02g52650.1	chlorophyll A-B binding protein
	LOC_Os05g01290.1	expressed protein
	LOC_Os04g51792.1	PAP fibrillin family domain containing protein
	LOC_Os06g01934.1	homeobox domain containing protein
	LOC_Os11g05260.1	phosphoglycerate mutase
	LOC_Os01g68480.1	thioredoxin
	LOC_Os10g38710.1	glutathione S-transferase
	LOC_Os11g10990.1	heat shock protein DnaJ
	LOC_Os01g10810.1	rho termination factor
	LOC_Os02g21340.1	ABC-2 type transporter family protein
	LOC_Os10g40990.1	flavonol synthase/flavanone 3-hydroxylase
	LOC_Os02g37060.1	photosystem II 5 kDa protein
	LOC_Os02g45520.2	uncharacterized membrane protein
	LOC_Os03g44740.1	cytochrome P450
	LOC_Os11g26890.2	expressed protein
	LOC_Os12g08790.1	TPR domain protein
	LOC_Os07g08150.1	early light-induced protein
	LOC_Os05g43910.1	cytochrome P450
	LOC_Os02g41710.1	cyclic nucleotide-gated ion channel
	LOC_Os03g43114.2	expressed protein
	LOC_Os04g42590.1	expressed protein
	LOC_Os05g40960.1	Myb transcription factor
	LOC_Os06g12320.1	transmembrane amino acid transporter protein
	LOC_Os10g33460.1	alcohol oxidase
	LOC_Os02g58100.1	expressed protein
	LOC_Os03g24590.1	mTERF domain containing protein
	LOC_Os04g53680.1	cyclin
	LOC_Os07g30960.1	monooxygenase
	LOC_Os08g37010.1	gibberellin receptor GID1L2
	LOC_Os08g41000.1	extracellular ligand-gated ion channel
Module 3	LOC_Os05g36280.1	histone H3
	LOC_Os06g06510.1	histone H3
	LOC_Os01g59120.1	cyclin
	LOC_Os03g56070.1	expressed protein
	LOC_Os04g41900.1	expressed protein
	LOC_Os03g41060.1	GASR2 - Gibberellin-regulated GASA/GAST/Snakin family protein precursor
	LOC_Os11g02464.1	vacuolar-sorting receptor precursor
	LOC_Os03g17100.1	Core histone H2A/H2B/H3/H4 domain containing protein
	LOC_Os06g06460.1	histone H3
	LOC_Os10g42660.1	expressed protein
	LOC_Os11g29380.1	MCM2 - Putative minichromosome maintenance MCM complex subunit 2
	LOC_Os03g11540.1	RPA1B - Putative single-stranded DNA binding complex subunit 1
	LOC_Os12g06980.1	SAP domain containing protein
	LOC_Os10g02770.1	glycosyl hydrolases family 16
	LOC_Os03g22040.1	expressed protein
	LOC_Os03g51870.1	FHA domain containing protein
	LOC_Os03g38010.1	nuf2 family protein
	LOC_Os11g31980.1	OsSCP63 - Putative Serine Carboxypeptidase homologue
	LOC_Os06g10230.1	receptor-like protein kinase 5 precursor
	LOC_Os04g15800.1	expressed protein
	LOC_Os05g38480.1	kinesin motor domain containing protein
	LOC_Os12g19180.1	ATP binding protein
	LOC_Os12g44090.1	leucine-rich repeat family protein
	LOC_Os10g28230.1	Core histone H2A/H2B/H3/H4 domain containing protein
	LOC_Os01g12460.1	expressed protein
	LOC_Os07g32390.1	targeting protein-related
	LOC_Os12g24550.1	expressed protein
	LOC_Os02g06340.1	EH domain-containing protein 1
	LOC_Os01g16650.1	ubiquitin-conjugating enzyme
	LOC_Os02g33420.1	ATPase
	LOC_Os03g30300.2	6-phosphogluconolactonase
	LOC_Os05g41390.1	cyclin
	LOC_Os10g35980.1	tetraspanin family protein
	LOC_Os06g51110.2	cyclin
	LOC_Os06g08790.1	ORC1 - Putative origin recognition complex subunit 1
	LOC_Os09g17850.1	acetyltransferase type B catalytic subunit
	LOC_Os07g46560.1	seven in absentia protein family domain containing protein
	LOC_Os03g06610.1	expressed protein
	LOC_Os06g03710.1	DELLA protein SLR1
	LOC_Os01g60670.1	receptor-like protein kinase precursor
	LOC_Os07g40480.1	zinc finger family protein
	LOC_Os07g22580.1	rhoGAP domain containing protein
	LOC_Os08g32600.1	STE_MEKK_ste11_MAP3K.21 - STE kinases include homologs to sterile 7
	LOC_Os07g05190.1	leucine-rich repeat family protein
	LOC_Os01g49200.1	microtubule associated protein
	LOC_Os02g56130.1	PCNA - Putative DNA replicative polymerase clamp
	LOC_Os01g09790.1	IQ calmodulin-binding motif domain containing protein
	LOC_Os11g05730.1	histone H3
	LOC_Os05g02300.1	Core histone H2A/H2B/H3/H4 domain containing protein
	LOC_Os02g58470.1	expressed protein
	LOC_Os06g07210.1	ribonucleoside-diphosphate reductase large subunit
	LOC_Os03g03630.1	expressed protein
	LOC_Os01g04230.1	inactive receptor kinase At2g26730 precursor
	LOC_Os05g46270.1	FEN1A - Putative flap endonuclease protein
	LOC_Os10g35450.1	serine/threonine-protein kinase
	LOC_Os09g30380.1	AP005392-AK108636 - NBS/LRR genes that are S-rich,divergent TIR
	LOC_Os10g31930.1	shugoshin-1
	LOC_Os02g50630.1	E2F family transcription factor protein
	LOC_Os09g02360.1	cyclin
	LOC_Os02g27810.1	MazG nucleotide pyrophosphohydrolase domain containing protein
	LOC_Os05g47790.1	expressed protein
	LOC_Os01g36390.1	MCM4 - Putative minichromosome maintenance MCM complex subunit 4
	LOC_Os03g46920.1	expressed protein
	LOC_Os01g70560.1	expressed protein
	LOC_Os01g04170.1	expressed protein
	LOC_Os04g33680.1	glutaredoxin
	LOC_Os09g28120.1	OsFBX330 - F-box domain containing protein
	LOC_Os09g38450.1	expressed protein
	LOC_Os08g44420.1	kinesin-related protein
	LOC_Os03g50140.1	plastocyanin-like domain containing protein
	LOC_Os12g26060.1	bifunctional dihydrofolate reductase-thymidylate synthase
	LOC_Os12g03130.1	CDC45A - Putative DNA replication initiation protein
	LOC_Os09g37510.1	DUF292 domain containing protein
	LOC_Os12g17530.1	expressed protein
	LOC_Os05g43140.1	expressed protein
	LOC_Os02g50910.1	expressed protein
	LOC_Os06g09420.1	B3 DNA binding domain containing protein
	LOC_Os12g02390.1	vacuolar-sorting receptor precursor
	LOC_Os08g34380.2	receptor-like kinase
	LOC_Os04g10650.1	CDT1A - Putative DNA replication initiation protein
	LOC_Os03g21730.1	receptor-like protein kinase precursor
	LOC_Os08g25799.1	Myb transcription factor
	LOC_Os09g36740.1	tetratricopeptide repeat domain containing protein
	LOC_Os03g39020.1	Kinesin motor domain domain containing protein
	LOC_Os03g30260.1	COBRA-like protein precursor
	LOC_Os02g10020.1	Mad3/BUB1 homology region 1 domain containing protein
	LOC_Os03g07810.1	expressed protein
	LOC_Os03g45760.1	expressed protein
	LOC_Os02g35230.1	expressed protein
	LOC_Os01g56020.1	expressed protein
	LOC_Os06g46990.1	expressed protein
	LOC_Os06g17490.1	expressed protein
	LOC_Os05g13630.1	RNA recognition motif containing protein
	LOC_Os02g44740.1	expressed protein
	LOC_Os08g28870.1	receptor-like protein kinase 5 precursor
	LOC_Os07g09690.1	galactosyltransferase family protein
	LOC_Os05g06840.1	POLE2A - Putative DNA polymerase epsilon complex subunit
	LOC_Os08g05560.1	zinc finger
	LOC_Os12g42700.1	expressed protein
	LOC_Os09g38710.2	HEAT repeat family protein
	LOC_Os03g17960.2	expressed protein
	LOC_Os02g50040.1	endoglucanase
	LOC_Os12g16210.1	zinc finger family protein
	LOC_Os05g14590.1	MCM6 - Putative minichromosome maintenance MCM complex subunit 6
	LOC_Os04g43300.1	BRCA1 C Terminus domain containing protein
	LOC_Os03g59550.1	RNA recognition motif containing protein
	LOC_Os03g50420.1	expressed protein
	LOC_Os02g36500.1	expressed protein
	LOC_Os04g42540.1	expressed protein
	LOC_Os08g01100.1	HMG1/2
	LOC_Os03g04550.1	expressed protein
	LOC_Os01g67110.1	expressed protein
	LOC_Os10g35580.1	ATEB1A-like microtubule associated protein
	LOC_Os02g58220.1	RPA2A - Putative single-stranded DNA binding complex subunit 2
	LOC_Os03g06670.1	Core histone H2A/H2B/H3/H4 domain containing protein
	LOC_Os03g14140.1	POEI16 - Pollen Ole e I allergen and extensin family protein precursor
	LOC_Os02g56540.1	kinesin motor domain containing protein
	LOC_Os05g02580.1	expressed protein
	LOC_Os07g29190.1	expressed protein
	LOC_Os06g03720.1	ribonucleoside-diphosphate reductase small chain
	LOC_Os04g47580.1	cyclin
	LOC_Os06g02530.1	expressed protein
	LOC_Os01g01890.1	expressed protein
	LOC_Os01g03490.1	heavy-metal-associated domain-containing protein
	LOC_Os09g19930.1	HOTHEAD precursor
	LOC_Os03g02290.2	kinesin motor domain containing protein
	LOC_Os03g58850.1	uncharacterized PE-PGRS family protein PE_PGRS3 precursor
	LOC_Os04g48490.1	fasciclin-like arabinogalactan protein
	LOC_Os07g43540.1	ORC6 - Putative origin recognition complex subunit 6
	LOC_Os08g39590.1	inactive receptor kinase At2g26730 precursor
	LOC_Os10g25450.1	OsSub60 - Putative Subtilisin homologue
	LOC_Os12g29980.2	growth regulating factor protein
	LOC_Os01g42070.1	kinesin motor domain containing protein
	LOC_Os02g10490.1	expressed protein
	LOC_Os02g45940.1	Core histone H2A/H2B/H3/H4 domain containing protein
	LOC_Os02g56520.1	expressed protein
	LOC_Os03g41100.1	cyclin
	LOC_Os03g53920.1	kinesin motor domain containing protein
	LOC_Os03g11400.2	targeting protein-related
	LOC_Os03g52650.1	syntaxin-related protein
	LOC_Os04g50960.1	expressed protein
Module 4	LOC_Os03g03810.1	DEF8 - Defensin and Defensin-like DEFL family
	LOC_Os05g02060.1	mitochondrial import inner membrane translocase subunit Tim17
	LOC_Os01g12580.1	late embryogenesis abundant protein
	LOC_Os08g36440.2	HVA22
	LOC_Os05g31670.1	AWPM-19-like membrane family protein
	LOC_Os03g49190.1	oleosin
	LOC_Os06g06560.1	starch synthase
	LOC_Os05g28210.1	small hydrophilic plant seed protein
	LOC_Os07g24000.1	AWPM-19-like membrane family protein
	LOC_Os05g04870.1	oxidoreductase
	LOC_Os02g04780.1	expressed protein
	LOC_Os05g49170.1	cold acclimation protein WCOR413
	LOC_Os03g45210.1	2-aminoethanethiol dioxygenase
	LOC_Os03g16940.1	glyoxalase family protein
	LOC_Os01g63010.1	universal stress protein domain containing protein
	LOC_Os02g15740.1	expressed protein
	LOC_Os12g39400.1	ZOS12-09 - C2H2 zinc finger protein
	LOC_Os01g62190.1	ZOS1-15 - C2H2 zinc finger protein
	LOC_Os06g30370.1	osMFT1
	LOC_Os03g21620.1	AGC_AGC_other_RS6K_like.1 - ACG kinases include homologs to PKA
	LOC_Os08g20020.2	octicosapeptide/Phox/Bem1p
	LOC_Os04g58310.1	CBS domain-containing protein
	LOC_Os06g10530.1	expressed protein
	LOC_Os02g53410.1	expressed protein
	LOC_Os02g08320.1	haemolysin-III
	LOC_Os10g09850.1	EF hand family protein
	LOC_Os04g19740.1	transketolase
	LOC_Os04g32080.1	11-beta-hydroxysteroid dehydrogenase
	LOC_Os01g16920.1	embryonic protein DC-8
	LOC_Os12g06010.1	retrotransposon protein
	LOC_Os03g47120.1	CBS domain containing protein
	LOC_Os03g02050.1	LTPL151 - Protease inhibitor/seed storage/LTP family protein precursor
	LOC_Os05g32710.1	Alpha amylase
	LOC_Os10g35050.1	aquaporin protein
	LOC_Os01g59100.1	cytokinin-N-glucosyltransferase 1
	LOC_Os12g05330.1	protein of unknown function containing protein
	LOC_Os01g53650.1	zinc finger CCCH type family protein
	LOC_Os01g45460.1	serine esterase
	LOC_Os07g07240.2	ubiquitin-conjugating enzyme
	LOC_Os01g73110.1	expressed protein
	LOC_Os01g44250.1	CBS domain containing membrane protein
	LOC_Os06g02040.1	late embryogenesis abundant group 1
	LOC_Os08g45110.1	AP2 domain containing protein
	LOC_Os07g13830.1	OsFBX228 - F-box domain containing protein
	LOC_Os01g56610.1	homocysteine S-methyltransferase protein
	LOC_Os10g40040.1	expressed protein
	LOC_Os08g30820.1	cleavage and polyadenylation specificity factor subunit 5
	LOC_Os02g04160.1	transcription elongation factor 1
	LOC_Os01g50700.1	dehydrin family protein
	LOC_Os08g40930.1	Alpha amylase
	LOC_Os08g19420.1	O-methyltransferase
	LOC_Os01g06630.1	small hydrophilic plant seed protein
	LOC_Os12g27830.1	dehydrogenase/reductase
	LOC_Os02g03790.1	expressed protein
	LOC_Os03g61120.1	anthranilate synthase component I-1
	LOC_Os04g33150.1	desiccation-related protein PCC13-62 precursor
	LOC_Os10g41760.1	chlorophyllide a oxygenase
	LOC_Os10g36180.1	expressed protein
	LOC_Os04g39420.1	6-phosphofructokinase 2
	LOC_Os06g21910.1	late embryogenesis abundant group 1
	LOC_Os02g35150.1	splicing factor U2AF
	LOC_Os06g02160.1	AMP-binding enzyme family protein
	LOC_Os03g57900.1	zinc finger A20 and AN1 domain-containing stress-associated protein
	LOC_Os03g04080.1	expressed protein
	LOC_Os09g08280.1	expressed protein
	LOC_Os02g43620.1	transporter
	LOC_Os11g26780.1	dehydrin
	LOC_Os03g42520.1	expressed protein
	LOC_Os07g47840.1	expressed protein
	LOC_Os01g39020.1	HSF-type DNA-binding domain containing protein
	LOC_Os05g31020.1	eukaryotic peptide chain release factor subunit 1-1
	LOC_Os02g26720.1	Inositol 1
	LOC_Os11g26760.1	dehydrin
	LOC_Os07g49470.1	protein kinase APK1B
	LOC_Os08g23870.1	late embryogenesis abundant group 1
	LOC_Os04g52110.1	late embryogenesis abundant protein
	LOC_Os08g37690.1	expressed protein
	LOC_Os05g08970.1	SSRP1-like FACT complex subunit
	LOC_Os02g32860.1	poly synthetase 3
	LOC_Os06g13720.1	dehydrogenase E1 component domain containing protein
	LOC_Os04g09390.1	HEV3 - Hevein family protein precursor
	LOC_Os03g48750.1	Cupin domain containing protein
	LOC_Os05g15880.1	glycosyl hydrolase
	LOC_Os07g07520.1	OsFBX217 - F-box domain containing protein
	LOC_Os08g39270.1	fasciclin domain containing protein
	LOC_Os06g11730.1	RNA recognition motif containing protein
	LOC_Os09g26380.1	aminotransferase
	LOC_Os03g51350.1	expressed protein
	LOC_Os04g32070.1	dehydrogenase/reductase
	LOC_Os08g23170.1	expressed protein
	LOC_Os06g23350.1	late embryogenesis abundant protein D-34
	LOC_Os04g52750.1	expressed protein
	LOC_Os09g04100.1	expressed protein
	LOC_Os03g26490.1	expressed protein
	LOC_Os02g06410.1	CBS domain containing membrane protein
	LOC_Os08g41030.1	AP2 domain containing protein
	LOC_Os06g11812.1	wound/stress protein
	LOC_Os05g23398.1	expressed protein
	LOC_Os04g43170.1	caleosin related protein
	LOC_Os05g49300.1	iron-sulfur cluster assembly enzyme ISCU
	LOC_Os06g04380.1	aminomethyltransferase
	LOC_Os03g10110.1	cupin domain containing protein
	LOC_Os09g15520.1	oleosin
	LOC_Os04g49980.1	late embryogenesis abundant group 1
	LOC_Os02g32660.1	1,4-alpha-glucan-branching enzyme
	LOC_Os05g02770.1	glycine-rich cell wall structural protein precursor
	LOC_Os05g28960.2	acyltransferase
	LOC_Os03g57960.1	cupin domain containing protein
	LOC_Os01g52830.1	DUF1264 domain containing protein
	LOC_Os01g12820.1	harpin-induced protein
	LOC_Os05g39690.1	oxidoreductase
	LOC_Os11g32890.1	expressed protein
	LOC_Os02g06530.1	armadillo/beta-catenin repeat family protein
	LOC_Os02g20970.1	C2 domain containing protein
	LOC_Os03g21650.1	expressed protein
	LOC_Os03g20680.1	late embryogenesis abundant protein 1
	LOC_Os04g32320.1	glycerophosphoryl diester phosphodiesterase family protein
	LOC_Os05g03130.1	OsRCI2-7 - Putative low temperature and salt responsive protein
	LOC_Os05g48650.1	transcription factor HBP-1b
	LOC_Os06g48170.1	glycosyl hydrolases family 16
	LOC_Os08g41750.1	OsFBX303 - F-box domain containing protein
	LOC_Os11g07911.1	expressed protein
	LOC_Os01g19770.1	mitochondrial import inner membrane translocase subunit Tim17
	LOC_Os02g09320.1	cytochrome P450
	LOC_Os06g29950.1	MATE domain containing protein
	LOC_Os09g39730.1	Core histone H2A/H2B/H3/H4 domain containing protein
	LOC_Os02g26470.1	expressed protein
	LOC_Os11g26570.1	dehydrin
	LOC_Os04g31710.1	expressed protein
	LOC_Os03g21260.1	2,3-bisphosphoglycerate-independent phosphoglycerate mutase
	LOC_Os05g39250.1	phosphatidylethanolamine-binding protein
	LOC_Os01g20850.1	conserved hypothetical protein
	LOC_Os07g09814.2	OsFBX221 - F-box domain containing protein
	LOC_Os12g43140.1	late embryogenesis abundant protein D-34
Module 5	LOC_Os08g06040.1	60S ribosomal protein L34
	LOC_Os02g41904.1	DEF7 - Defensin and Defensin-like DEFL family
	LOC_Os05g04410.1	peroxidase precursor
	LOC_Os04g59150.2	peroxidase precursor
	LOC_Os07g44740.1	chaperonin
	LOC_Os01g52490.1	40S ribosomal protein S24
	LOC_Os01g12650.1	reticulon domain containing protein
	LOC_Os12g40890.1	OsIAA30 - Auxin-responsive Aux/IAA gene family member
	LOC_Os11g32240.1	cytochrome P450 51
	LOC_Os07g44190.1	h/ACA ribonucleoprotein complex subunit 4
	LOC_Os06g45670.1	glycine cleavage system H protein
	LOC_Os03g17760.1	RNA recognition motif containing protein
	LOC_Os07g12250.1	ribosomal protein L24
	LOC_Os06g11800.1	annexin
	LOC_Os05g44070.1	ras-related protein
	LOC_Os01g37490.1	dynein light chain type 1 domain containing protein
	LOC_Os02g47130.1	expressed protein
	LOC_Os02g34690.1	transmembrane 9 superfamily member
	LOC_Os06g44080.1	ubiquitin family protein
	LOC_Os11g05180.1	expressed protein
	LOC_Os01g59730.1	ribosomal protein L7Ae
	LOC_Os08g02120.1	kinase
	LOC_Os01g70100.1	zinc finger DHHC domain-containing protein
	LOC_Os01g07570.1	carboxyl-terminal proteinase
	LOC_Os02g42660.1	sphingolipid delta desaturase
	LOC_Os10g40700.1	expansin precursor
	LOC_Os07g48370.1	glycosyl transferase
	LOC_Os03g59610.1	oxidoreductase
	LOC_Os08g35710.1	expressed protein
	LOC_Os05g37884.1	50S ribosomal protein L33
	LOC_Os06g16290.1	ribosomal protein L7Ae
	LOC_Os01g12390.1	inactive receptor kinase At2g26730 precursor
	LOC_Os03g02400.1	plastocyanin-like domain containing protein
	LOC_Os01g33040.1	kinesin motor domain containing protein
	LOC_Os07g43350.1	expressed protein
	LOC_Os04g56720.1	RCC2
	LOC_Os03g36910.1	SAM-dependent methyltransferase
	LOC_Os01g11340.1	cytochrome P450
	LOC_Os10g40530.1	LTPL146 - Protease inhibitor/seed storage/LTP family protein precursor
	LOC_Os06g35730.1	ribosomal protein L5
	LOC_Os03g14540.1	UDP-glucuronate 4-epimerase
	LOC_Os02g38340.1	actin
	LOC_Os10g40430.1	LTPL139 - Protease inhibitor/seed storage/LTP family protein precursor
	LOC_Os03g19990.1	WD40-like Beta Propeller Repeat family protein
	LOC_Os01g02930.1	glycosyltransferase protein
	LOC_Os05g19570.1	expansin precursor
	LOC_Os01g09470.1	IQ calmodulin-binding motif family protein
	LOC_Os03g01530.1	tubulin/FtsZ domain containing protein
	LOC_Os10g07290.1	glycosyl hydrolases family 17
	LOC_Os10g41430.1	cyclin
	LOC_Os05g32350.1	zinc finger
	LOC_Os09g25570.1	aspartic proteinase
	LOC_Os04g51710.1	expressed protein
	LOC_Os11g36340.1	lymphoid organ expressed yellow head virus receptor protein
	LOC_Os02g52550.1	uncharacterized Cys-rich domain containing protein
	LOC_Os05g50910.1	extra-large G-protein-related
	LOC_Os06g46500.1	monocopper oxidase
	LOC_Os03g59200.1	expressed protein
	LOC_Os05g05720.2	tetratricopeptide repeat domain containing protein
	LOC_Os07g12520.1	zinc ion binding protein
	LOC_Os02g32760.1	60S acidic ribosomal protein
	LOC_Os02g01920.1	GHMP kinases ATP-binding protein
	LOC_Os04g56180.1	peroxidase precursor
	LOC_Os09g35630.1	BAG domain-containing protein
	LOC_Os04g56390.1	expressed protein
	LOC_Os10g05690.1	transmembrane amino acid transporter protein
	LOC_Os11g05160.1	DNA binding protein
	LOC_Os01g66110.2	methyltransferase
	LOC_Os06g19380.1	expressed protein
	LOC_Os03g40070.1	transposon protein
	LOC_Os12g37780.1	tetratricopeptide repeat domain containing protein
	LOC_Os12g25120.1	core histone H2A/H2B/H3/H4
	LOC_Os05g03060.1	expressed protein
	LOC_Os01g72049.1	retrotransposon
	LOC_Os09g28019.1	nucleoporin p58/p45
	LOC_Os09g38400.1	prostatic spermine-binding protein precursor
	LOC_Os05g25540.1	STRUBBELIG-RECEPTOR FAMILY 6 precursor
	LOC_Os01g55150.1	bZIP transcription factor domain containing protein
	LOC_Os12g38320.1	expressed protein
	LOC_Os07g44590.1	peroxidase precursor
	LOC_Os03g55830.1	BTBN10 - Bric-a-Brac
	LOC_Os10g19200.1	vegetative cell wall protein gp1 precursor
	LOC_Os04g57970.1	expressed protein
	LOC_Os02g50550.1	dynamin
	LOC_Os02g45540.1	synthase
	LOC_Os08g08230.1	kinesin-like protein
	LOC_Os09g32250.1	DNA repair ATPase-related
	LOC_Os03g08790.1	aspartic proteinase nepenthesin precursor
	LOC_Os02g18410.1	salt stress root protein RS1
	LOC_Os12g06660.1	actin
	LOC_Os02g39300.1	RNA-binding protein Luc7-like
	LOC_Os01g62350.1	60S ribosomal protein L36-2
	LOC_Os12g35670.1	RALFL4 - Rapid ALkalinization Factor RALF family protein precursor
	LOC_Os10g07480.1	plant protein of unknown function DUF869 domain containing protein
	LOC_Os09g09980.1	glucan endo-1,3-beta-glucosidase precursor
	LOC_Os01g43380.1	glycosyltransferase family protein 1
	LOC_Os07g02200.1	plastocyanin-like domain containing protein
	LOC_Os03g46260.1	DUF581 domain containing protein
	LOC_Os12g40900.1	OsIAA31 - Auxin-responsive Aux/IAA gene family member
	LOC_Os03g46640.1	deoxyuridine 5-triphosphate nucleotidohydrolase
	LOC_Os05g51830.1	ZOS5-12 - C2H2 zinc finger protein
	LOC_Os03g14530.1	S10/S20 domain containing ribosomal protein
	LOC_Os12g36810.1	polygalacturonase
	LOC_Os03g43410.1	OsIAA12 - Auxin-responsive Aux/IAA gene family member
	LOC_Os01g50160.1	MDR-like ABC transporter
	LOC_Os01g71170.1	classical arabinogalactan protein 26 precursor
	LOC_Os03g07450.1	homeobox associated leucine zipper
	LOC_Os08g42080.1	ACR5
	LOC_Os01g45700.1	expressed protein
	LOC_Os02g07190.1	expressed protein
	LOC_Os02g14910.1	bZIP transcription factor family protein
	LOC_Os05g04470.1	peroxidase precursor
	LOC_Os05g48330.1	aspartyl protease family protein
	LOC_Os05g44400.1	GATA zinc finger domain containing protein
	LOC_Os06g14280.1	cysteine-rich repeat secretory protein precursor
	LOC_Os12g07480.1	TCP family transcription factor
	LOC_Os08g38970.1	transmembrane receptor
Module 6	LOC_Os01g45470.1	expressed protein
	LOC_Os01g73940.1	expressed protein
	LOC_Os07g38810.1	lectin receptor-type protein kinase
	LOC_Os03g56580.1	no apical meristem protein
	LOC_Os10g39030.1	homeobox domain containing protein
	LOC_Os08g41090.1	peroxidase precursor
	LOC_Os01g70210.1	CRAL/TRIO domain containing protein
	LOC_Os09g24620.1	expressed protein
	LOC_Os12g25170.1	NB-ARC domain containing disease resistance protein
	LOC_Os11g06220.2	expressed protein
	LOC_Os09g33490.1	no apical meristem protein
	LOC_Os10g04720.1	TKL_IRAK_DUF26-la.5 - DUF26 kinases have homology to DUF26 containing loci
	LOC_Os02g30110.1	cytochrome P450
	LOC_Os04g15580.1	serine/threonine-protein kinase receptor precursor
	LOC_Os07g38250.1	expressed protein
	LOC_Os03g56160.1	lectin-like receptor kinase 7
	LOC_Os01g41820.1	cytochrome P450 72A1
	LOC_Os03g61310.1	receptor-like protein kinase
	LOC_Os04g21820.1	OsWAK33 - OsWAK receptor-like protein OsWAK-RLP
	LOC_Os01g12400.2	S-locus lectin protein kinase family protein
	LOC_Os07g04910.1	reticulon domain containing protein
	LOC_Os05g43170.1	calreticulin precursor protein
	LOC_Os10g30880.2	expressed protein
	LOC_Os07g03040.2	expressed protein
	LOC_Os01g37750.1	glutathione S-transferase
	LOC_Os01g02680.1	protein kinase domain containing protein
	LOC_Os07g34980.1	TKL_IRAK_DUF26-lh.9 - DUF26 kinases have homology to DUF26 containing loci
	LOC_Os01g58280.1	OsSub8 - Putative Subtilisin homologue
	LOC_Os09g04310.1	expressed protein
	LOC_Os01g09190.1	expressed protein
	LOC_Os10g02480.1	oxidoreductase
	LOC_Os01g37050.1	ribonuclease III domain protein
	LOC_Os01g48950.1	expressed protein
	LOC_Os10g30410.1	cytochrome P450 71D7
	LOC_Os10g42040.1	expressed protein
	LOC_Os02g08140.1	CAMK_KIN1/SNF1/Nim1_like.14 - CAMK includes calcium/calmodulin depedent protein kinases
	LOC_Os02g36150.1	cytochrome P450
	LOC_Os03g03260.1	homeobox domain containing protein
	LOC_Os12g24320.1	ATPase 3
	LOC_Os01g65030.1	S-locus-specific glycoprotein precursor
	LOC_Os05g28090.3	expressed protein
	LOC_Os04g51030.1	wall-associated kinase 1
	LOC_Os05g25370.1	TKL_IRAK_CrRLK1L-1.2 - The CrRLK1L-1 subfamily has homology to the CrRLK1L homolog
	LOC_Os02g51900.1	cytokinin-O-glucosyltransferase 2
	LOC_Os11g10120.1	expressed protein
	LOC_Os07g44130.1	cytochrome P450 72A1
	LOC_Os06g47640.1	OsCML29 - Calmodulin-related calcium sensor protein
	LOC_Os12g42220.1	expressed protein
	LOC_Os12g33130.1	expressed protein
	LOC_Os12g43970.1	hydrolase
	LOC_Os03g06139.1	ABC-2 type transporter domain containing protein
	LOC_Os11g39370.1	BRASSINOSTEROID INSENSITIVE 1-associated receptor kinase 1 precursor
	LOC_Os01g66680.1	S-domain receptor-like protein kinase
	LOC_Os01g53930.2	hexokinase
	LOC_Os02g06200.1	phytosulfokine receptor precursor
	LOC_Os01g20910.1	zinc finger
	LOC_Os01g09150.1	expressed protein
	LOC_Os04g27540.1	terpene synthase
	LOC_Os04g54070.1	receptor-like kinase
	LOC_Os06g45970.1	OsSAUR26 - Auxin-responsive SAUR gene family member
	LOC_Os07g03880.1	lectin-like receptor kinase
	LOC_Os07g18240.1	lectin-like receptor kinase
	LOC_Os01g33110.1	receptor-like protein kinase 5 precursor
	LOC_Os09g09510.1	legume lectins beta domain containing protein
	LOC_Os09g14490.1	TIR-NBS type disease resistance protein
	LOC_Os10g04490.1	conserved hypothetical protein
	LOC_Os10g04520.1	expressed protein
	LOC_Os11g31530.1	BRASSINOSTEROID INSENSITIVE 1-associated receptor kinase 1 precursor
	LOC_Os01g02790.1	protein kinase domain containing protein
	LOC_Os07g02620.1	NB-ARC domain containing protein
	LOC_Os01g02810.1	resistance-related receptor-like kinase
	LOC_Os04g10940.1	expressed protein
	LOC_Os06g37150.1	L-ascorbate oxidase precursor
	LOC_Os02g13430.1	receptor-like protein kinase 5 precursor
	LOC_Os04g47770.1	cis-zeatin O-glucosyltransferase
	LOC_Os02g18070.1	NB-ARC domain containing protein
	LOC_Os05g33160.1	inactive receptor kinase At1g27190 precursor
	LOC_Os06g06960.1	S-locus-like receptor protein kinase
	LOC_Os07g03890.1	lectin-like receptor kinase 7
	LOC_Os02g39660.1	receptor kinase
	LOC_Os08g09290.1	expressed protein
	LOC_Os09g09500.1	lectin-like receptor kinase
	LOC_Os04g11780.1	resistance protein LR10
	LOC_Os04g43550.1	MazG nucleotide pyrophosphohydrolase domain containing protein
	LOC_Os04g30930.1	NB-ARC domain containing protein
	LOC_Os12g10180.1	NBS-LRR type disease resistance protein Rps1-k-2
	LOC_Os05g13770.1	RNA polymerase Rpb7
	LOC_Os09g39620.1	protein kinase family protein
	LOC_Os01g49580.1	Protein kinase domain containing protein
	LOC_Os11g10320.1	expressed protein
Module 7	LOC_Os02g51350.1	OsFBK10 - F-box domain and kelch repeat containing protein
	LOC_Os04g57550.1	amine oxidase
	LOC_Os10g25290.1	ZIM domain containing protein
	LOC_Os07g48630.2	ethylene-insensitive 3
	LOC_Os02g44870.1	dehydrin
	LOC_Os02g52780.1	bZIP transcription factor
	LOC_Os03g13810.3	expressed protein
	LOC_Os11g05380.1	cytochrome P450
	LOC_Os04g41960.1	NADP-dependent oxidoreductase
	LOC_Os03g60570.1	ZOS3-22 - C2H2 zinc finger protein
	LOC_Os05g31620.1	OsCML15 - Calmodulin-related calcium sensor protein
	LOC_Os05g03620.1	TKL_IRAK_CR4L.4 - The CR4L subfamily has homology with Crinkly4
	LOC_Os04g39080.1	OsFBX140 - F-box domain containing protein
	LOC_Os03g55450.2	expressed protein
	LOC_Os05g46340.1	expressed protein
	LOC_Os09g21710.1	AN1-like zinc finger domain containing protein
	LOC_Os09g38320.1	phytoene synthase
	LOC_Os05g41780.1	AP2 domain containing protein
	LOC_Os02g58080.1	transporter
	LOC_Os02g37930.1	hypoxia-responsive family protein
	LOC_Os02g04130.1	DUF1645 domain containing protein
	LOC_Os01g50420.1	STE_MEKK_ste11_MAP3K.7 - STE kinases include homologs to sterile 7
	LOC_Os05g48690.1	transcription factor like protein
	LOC_Os01g60420.1	expressed protein
	LOC_Os01g04330.1	OsCML16 - Calmodulin-related calcium sensor protein
	LOC_Os01g58420.1	AP2 domain containing protein
	LOC_Os06g04230.1	expressed protein
	LOC_Os10g25230.1	ZIM domain containing protein
	LOC_Os06g04240.1	expressed protein
	LOC_Os08g38890.1	expressed protein
	LOC_Os04g58090.1	harpin-induced protein 1 domain containing protein
	LOC_Os01g72970.1	DUF630/DUF632 domains containing protein
	LOC_Os03g56860.1	expressed protein
	LOC_Os09g28354.1	CPuORF39 - conserved peptide uORF-containing transcript
	LOC_Os01g64360.1	MYB family transcription factor
	LOC_Os01g19130.1	protein phosphatase 2C
	LOC_Os02g54780.1	CYPRO4
	LOC_Os03g21640.2	expressed protein
	LOC_Os01g50410.1	STE_MEKK_ste11_MAP3K.6 - STE kinases include homologs to sterile 7
	LOC_Os01g50400.1	STE_MEKK_ste11_MAP3K.5 - STE kinases include homologs to sterile 7
	LOC_Os02g32580.1	expressed protein
	LOC_Os03g32230.1	ZOS3-12 - C2H2 zinc finger protein
	LOC_Os09g28440.1	AP2 domain containing protein
	LOC_Os03g15270.1	gibberellin receptor GID1L2
	LOC_Os02g41840.1	DUF584 domain containing protein
	LOC_Os05g50100.1	expressed protein
	LOC_Os03g62200.1	ammonium transporter protein
	LOC_Os06g11450.1	zinc finger
	LOC_Os06g44250.1	haemolysin-III
	LOC_Os02g50600.1	glycosyl transferase 8 domain containing protein
	LOC_Os05g31970.1	expressed protein
	LOC_Os08g34800.1	expressed protein
	LOC_Os02g50940.1	NHL repeat-containing protein
	LOC_Os09g17152.1	OsFBX319 - F-box domain containing protein
	LOC_Os07g03170.1	expressed protein
	LOC_Os05g46760.1	STE_MEKK_ste11_MAP3K.19 - STE kinases include homologs to sterile 7
	LOC_Os04g33820.1	OsFBX132 - F-box domain containing protein
	LOC_Os03g45370.1	sodium/calcium exchanger protein
	LOC_Os05g44900.1	expressed protein
	LOC_Os01g72000.1	armadillo repeat-containing protein
	LOC_Os04g58850.1	harpin-induced protein 1 domain containing protein
	LOC_Os07g37400.1	OsFBX257 - F-box domain containing protein
	LOC_Os02g22160.1	DNA binding protein
	LOC_Os04g52090.1	AP2 domain containing protein
	LOC_Os05g47960.1	expressed protein
	LOC_Os01g47730.1	ras-related protein
	LOC_Os01g17050.1	VQ domain containing protein
	LOC_Os01g40070.1	expressed protein
	LOC_Os01g48446.1	no apical meristem protein
	LOC_Os08g34580.1	trehalose-6-phosphate synthase
	LOC_Os06g51360.2	lysM domain containing protein
	LOC_Os12g14930.1	ATP synthase protein MI25
	LOC_Os12g32610.1	expressed protein
	LOC_Os12g34014.1	NADH-ubiquinone oxidoreductase chain 6
	LOC_Os03g14370.2	ACT domain containing protein
	LOC_Os08g28710.1	receptor protein kinase CRINKLY4 precursor
	LOC_Os04g45940.1	transcription factor like protein
Module 8	LOC_Os11g17610.1	expressed protein
	LOC_Os10g39220.1	tobamovirus multiplication protein
	LOC_Os03g60370.1	histidine acid phosphatase
	LOC_Os03g58170.2	stem-specific protein TSJT1
	LOC_Os05g41620.1	expressed protein
	LOC_Os08g27050.1	expressed protein
	LOC_Os08g02460.1	expressed protein
	LOC_Os09g39020.1	N-rich protein
	LOC_Os05g48810.1	dnaJ domain containing protein
	LOC_Os07g44950.1	bZIP transcription factor domain containing protein
	LOC_Os01g13280.1	ubiquitin conjugating enzyme protein
	LOC_Os08g43300.1	UBX domain-containing protein
	LOC_Os03g53910.1	tetratricopeptide repeat domain containing protein
	LOC_Os01g56010.1	serpin domain containing protein
	LOC_Os05g38530.1	DnaK family protein
	LOC_Os01g04370.1	hsp20/alpha crystallin family protein
	LOC_Os01g04380.1	hsp20/alpha crystallin family protein
	LOC_Os07g12630.1	transcription elongation factor protein
	LOC_Os03g41460.1	CAMK_CAMK_like.20 - CAMK includes calcium/calmodulin depedent protein kinases
	LOC_Os07g35300.1	TKL_IRAK_DUF26-lc.11 - DUF26 kinases have homology to DUF26 containing loci
	LOC_Os05g49730.1	protein phosphatase 2C
	LOC_Os02g15930.1	expressed protein
	LOC_Os01g04340.1	hsp20/alpha crystallin family protein
	LOC_Os12g40780.1	ankyrin repeat domain-containing protein 44
	LOC_Os07g40250.1	sex determination protein tasselseed-2
	LOC_Os10g28000.1	glutathione reductase
	LOC_Os02g08490.1	chaperone protein clpB 1
	LOC_Os01g01610.1	IscA-like iron-sulfur assembly protein
	LOC_Os08g04810.1	serine esterase family protein
	LOC_Os03g02260.1	DnaK family protein
	LOC_Os02g50210.1	erwinia induced protein 2
	LOC_Os07g02710.1	expressed protein
	LOC_Os04g36750.1	hsp20/alpha crystallin family protein
	LOC_Os05g03910.1	RNA polymerase II-associated protein 3
	LOC_Os02g37309.1	expressed protein
	LOC_Os10g41360.1	ARABIDILLO-1
	LOC_Os05g44340.1	heat shock protein 101
	LOC_Os03g14180.1	hsp20/alpha crystallin family protein
	LOC_Os01g04360.1	hsp20/alpha crystallin family protein
	LOC_Os03g50250.1	DnaK family protein
	LOC_Os03g53400.1	transmembrane BAX inhibitor motif-containing protein
	LOC_Os10g19160.1	receptor kinase
	LOC_Os11g05170.1	expressed protein
	LOC_Os01g68960.1	conserved hypothetical protein
	LOC_Os07g43950.1	RNA recognition motif containing protein
	LOC_Os06g09560.1	heat shock protein DnaJ
	LOC_Os03g22960.1	expressed protein
	LOC_Os03g38500.1	expressed protein
Module 9	LOC_Os04g41250.1	armadillo/beta-catenin repeat family protein
	LOC_Os01g62660.1	MYB family transcription factor
	LOC_Os03g04770.1	beta-amylase
	LOC_Os06g03390.1	expressed protein
	LOC_Os06g02019.1	cytochrome P450
	LOC_Os11g31400.1	expressed protein
	LOC_Os10g40090.1	expansin precursor
	LOC_Os02g43810.1	expressed protein
	LOC_Os02g48330.1	3-hydroxy-3-methylglutaryl-coenzyme A reductase
	LOC_Os02g17780.1	ent-kaurene synthase
	LOC_Os07g31650.1	expressed protein
	LOC_Os05g06670.1	gibberellin 2-oxidase
	LOC_Os02g37910.1	expressed protein
	LOC_Os02g48740.1	fimbrin-like protein 2
	LOC_Os06g03980.1	expressed protein
	LOC_Os07g08000.1	expressed protein
	LOC_Os10g32810.1	beta-amylase
	LOC_Os01g11350.1	bZIP transcription factor domain containing protein
	LOC_Os07g01770.1	expressed protein
	LOC_Os01g62950.1	ras-related protein
	LOC_Os04g58100.1	expressed protein
	LOC_Os07g02780.1	STE_MEKK_ste11_MAP3K.20 - STE kinases include homologs to sterile 7
	LOC_Os10g11980.1	transferase family protein
	LOC_Os05g11720.1	zinc finger
	LOC_Os01g23880.1	expressed protein
	LOC_Os10g33240.1	expressed protein
	LOC_Os01g12470.1	mitochondrial carrier protein
	LOC_Os10g37510.1	expressed protein
	LOC_Os02g39950.1	EF hand family protein
	LOC_Os11g22350.1	white-brown complex homolog protein
	LOC_Os07g08060.1	transmembrane BAX inhibitor motif-containing protein
	LOC_Os05g38980.1	respiratory burst oxidase
	LOC_Os01g51040.1	transmembrane protein 16K
	LOC_Os05g23194.1	expressed protein
	LOC_Os05g26660.1	NADH-ubiquinone oxidoreductase
	LOC_Os05g14750.1	AGC_PVPK_like_kin82y.12 - ACG kinases include homologs to PKA
	LOC_Os03g17940.1	phosphatase
	LOC_Os04g57750.1	plastocyanin-like domain containing protein
	LOC_Os04g39489.1	amino acid transporter
	LOC_Os05g24770.1	reticulon domain containing protein
	LOC_Os03g51010.1	hydrolase
	LOC_Os02g54890.1	UDP-glucuronate 4-epimerase
	LOC_Os03g10390.1	expressed protein
	LOC_Os02g04630.1	sodium/calcium exchanger protein
	LOC_Os03g50280.1	GLTP domain containing protein
	LOC_Os03g27110.1	hydrolase protein
	LOC_Os08g42390.1	glycerophosphoryl diester phosphodiesterase family protein
Module 10	LOC_Os02g46420.1	transposon protein
	LOC_Os12g17880.1	armadillo/beta-catenin repeat protein-related
	LOC_Os01g70130.1	protein kinase domain containing protein
	LOC_Os03g11900.1	transporter family protein
	LOC_Os03g05620.1	inorganic phosphate transporter
	LOC_Os08g03350.1	amino acid transporter
	LOC_Os07g35810.1	TKL_IRAK_DUF26-ld.6 - DUF26 kinases have homology to DUF26 containing loci
	LOC_Os07g42510.1	AP2 domain containing protein
	LOC_Os05g34270.1	inactive receptor kinase At1g27190 precursor
	LOC_Os04g31030.1	nitrate-induced NOI protein
	LOC_Os01g70490.1	potassium transporter
	LOC_Os04g38480.1	BRASSINOSTEROID INSENSITIVE 1-associated receptor kinase 1 precursor
	LOC_Os03g03200.2	hydrolase
	LOC_Os04g37670.1	steroid nuclear receptor
	LOC_Os06g12120.1	BRASSINOSTEROID INSENSITIVE 1-associated receptor kinase 1 precursor
	LOC_Os01g37040.1	retrotransposon protein
	LOC_Os03g05470.1	tyrosine protein kinase domain containing protein
	LOC_Os02g45170.1	helix-loop-helix DNA-binding protein
	LOC_Os09g24924.1	transporter family protein
	LOC_Os02g39400.1	isochorismatase family protein
	LOC_Os05g25390.1	tyrosine protein kinase domain containing protein
	LOC_Os06g41450.1	VQ domain containing protein
	LOC_Os03g08490.1	AP2 domain containing protein
	LOC_Os01g11160.1	amino acid permease family protein
	LOC_Os10g42960.1	urea active transporter
	LOC_Os04g53998.1	kinase
	LOC_Os02g05960.1	phytosulfokine receptor precursor
	LOC_Os03g58980.1	Cupin domain containing protein
	LOC_Os07g49080.1	COBRA-like protein 7 precursor
	LOC_Os04g52190.1	vacuolar-sorting receptor precursor
	LOC_Os11g06780.1	serine/threonine-protein kinase BRI1-like 1 precursor
	LOC_Os04g42480.1	receptor-like protein kinase At3g46290 precursor
	LOC_Os02g50130.1	hydrolase
	LOC_Os12g06220.1	harpin-induced protein 1 domain containing protein
	LOC_Os04g48130.1	OsRhmbd11 - Putative Rhomboid homologue
	LOC_Os09g28650.1	gibberellin receptor
	LOC_Os09g26144.1	glutamate receptor
	LOC_Os08g37670.1	plastocyanin-like domain containing protein
	LOC_Os07g39350.1	transporter family protein
	LOC_Os01g11520.1	RING-H2 finger protein
	LOC_Os04g41229.1	helix-loop-helix DNA-binding domain containing protein
	LOC_Os03g62010.1	harpin-induced protein 1 domain containing protein
	LOC_Os07g14740.1	harpin-induced protein 1 domain containing protein
	LOC_Os12g36940.1	calmodulin binding protein
	LOC_Os06g09980.1	expressed protein
	LOC_Os02g19530.1	lectin-like receptor kinase
	LOC_Os11g12330.1	disease resistance protein RPM1
Module 11	LOC_Os06g35520.1	peroxidase precursor
	LOC_Os03g08460.1	AP2 domain containing protein
	LOC_Os08g04210.1	cysteine-rich repeat secretory protein 55 precursor
	LOC_Os11g02080.1	expressed protein
	LOC_Os03g18220.2	pyruvate decarboxylase isozyme 2
	LOC_Os09g28580.1	expressed protein
	LOC_Os08g04240.1	cysteine-rich repeat secretory protein 55 precursor
	LOC_Os07g02940.1	DUF538 domain containing protein
	LOC_Os11g47520.1	glycosyl hydrolase
	LOC_Os06g50080.1	DUF581 domain containing protein
	LOC_Os11g47600.1	glycosyl hydrolase
	LOC_Os08g38600.1	copine
	LOC_Os01g20980.1	pectinesterase
	LOC_Os10g39920.1	expressed protein
	LOC_Os07g34640.1	pyruvate Pi dikinase regulatory protein
	LOC_Os11g47510.1	glycosyl hydrolase
	LOC_Os09g31040.1	EF hand family protein
	LOC_Os09g30490.1	EF hand family protein
	LOC_Os07g48870.1	MYB family transcription factor
	LOC_Os03g63970.1	gibberellin 20 oxidase 1
	LOC_Os11g33270.1	glycosyl hydrolases family 16
	LOC_Os01g71090.1	xylanase inhibitor
	LOC_Os05g15530.1	aminotransferase domain containing protein
	LOC_Os08g40680.1	glycosyl hydrolase
	LOC_Os03g03790.1	AMP-binding domain containing protein
	LOC_Os11g47560.1	glycosyl hydrolase
	LOC_Os11g47590.1	glycosyl hydrolase
	LOC_Os09g32670.1	UDP-glucuronate 4-epimerase
	LOC_Os08g03420.3	kelch repeat protein
	LOC_Os11g47610.1	glycosyl hydrolase
	LOC_Os06g45060.1	expressed protein
	LOC_Os05g45020.1	zinc finger/CCCH transcription factor
	LOC_Os04g09570.1	expressed protein
	LOC_Os02g11760.1	pleiotropic drug resistance protein
	LOC_Os03g40540.1	cytochrome P450
	LOC_Os07g40290.1	OsGH3.8 - Probable indole-3-acetic acid-amido synthetase
	LOC_Os08g25140.1	ethanol tolerance protein GEKO1
	LOC_Os05g09440.1	NADP-dependent malic enzyme
	LOC_Os01g65830.1	acyl-desaturase
	LOC_Os03g46300.1	conserved hypothetical protein
	LOC_Os12g38770.1	nucleotide pyrophosphatase/phosphodiesterase
	LOC_Os05g44922.2	6-phosphofructokinase
	LOC_Os05g47830.1	expressed protein
	LOC_Os02g46690.1	OsFBD8 - F-box and FBD domain containing protein
	LOC_Os06g05010.2	early nodulin 93 ENOD93 protein
	LOC_Os06g05000.1	early nodulin 93 ENOD93 protein
Module 12	LOC_Os06g49760.1	invertase/pectin methylesterase inhibitor family protein
	LOC_Os04g45270.1	aspartyl protease family protein
	LOC_Os03g06940.1	beta-galactosidase
	LOC_Os02g12730.3	beta-galactosidase precursor
	LOC_Os03g30950.1	acyl-desaturase
	LOC_Os01g68140.1	expressed protein
	LOC_Os08g41320.1	BHLH transcription factor
	LOC_Os09g28690.1	gibberellin receptor GID1L2
	LOC_Os12g37690.1	MYB family transcription factor
	LOC_Os07g41200.1	expressed protein
	LOC_Os03g43670.1	TKL_IRAK_CR4L.1 - The CR4L subfamily has homology with Crinkly4
	LOC_Os07g44830.1	proline-rich family protein
	LOC_Os01g70860.1	esterase
	LOC_Os06g04850.1	homeobox associated leucine zipper
	LOC_Os06g04870.1	homeobox associated leucine zipper
	LOC_Os07g01860.1	expressed protein
	LOC_Os07g42420.1	3-oxoacyl-synthase
	LOC_Os02g51620.1	glycosyl hydrolase family 3 protein
	LOC_Os01g33080.1	fimbrin-like protein 2
	LOC_Os01g72700.1	expressed protein
	LOC_Os04g55120.1	jp18
	LOC_Os11g04600.1	BTBA5 - Bric-a-Brac,Tramtrack
	LOC_Os07g04190.1	receptor protein kinase CLAVATA1 precursor
	LOC_Os12g39160.1	expressed protein
	LOC_Os04g38910.1	atypical receptor-like kinase MARK
	LOC_Os07g48620.1	expressed protein
	LOC_Os03g13570.1	glycosyl hydrolases family 16
	LOC_Os03g27760.1	nodulation protein-related
	LOC_Os05g32960.1	expressed protein
	LOC_Os12g06464.1	expressed protein
	LOC_Os08g43120.1	Plant PDR ABC transporter associated domain containing protein
	LOC_Os06g41910.1	expressed protein
	LOC_Os03g20500.1	OsFBX82 - F-box domain containing protein
	LOC_Os07g10530.1	carboxyl-terminal peptidase
	LOC_Os07g04020.1	expressed protein
	LOC_Os02g01140.1	GDSL-like lipase/acylhydrolase
	LOC_Os03g37810.1	expressed protein
	LOC_Os08g38400.1	oligopeptide transporter
	LOC_Os02g51320.1	helix-loop-helix DNA-binding domain containing protein
	LOC_Os02g51760.1	expressed protein
	LOC_Os06g44930.1	expressed protein
	LOC_Os08g04560.1	decarboxylase
Module 13	LOC_Os10g05980.1	POEI13 - Pollen Ole e I allergen and extensin family protein precursor
	LOC_Os05g09704.1	HAD superfamily phosphatase
	LOC_Os02g44320.1	LTPL113 - Protease inhibitor/seed storage/LTP family protein precursor
	LOC_Os10g38140.1	glutathione S-transferase
	LOC_Os01g38190.1	plant protein of unknown function domain containing protein
	LOC_Os02g37800.1	lecithin:cholesterol acyltransferase
	LOC_Os02g40100.1	plant protein of unknown function DUF869 domain containing protein
	LOC_Os04g26870.1	oxidoreductase
	LOC_Os01g62480.1	laccase precursor protein
	LOC_Os02g20560.1	fasciclin domain containing protein
	LOC_Os05g32820.1	peptide-N4-asparagine amidase A
	LOC_Os02g43194.1	aldehyde dehydrogenase
	LOC_Os06g15170.1	3-ketoacyl-CoA synthase
	LOC_Os08g35760.1	Cupin domain containing protein
	LOC_Os12g08760.1	carboxyvinyl-carboxyphosphonate phosphorylmutase
	LOC_Os08g31030.1	HOTHEAD precursor
	LOC_Os06g12790.3	ras-related protein
	LOC_Os04g46130.1	plastocyanin-like domain containing protein
	LOC_Os11g27400.1	glycosyl hydrolase
	LOC_Os01g36460.1	MYB family transcription factor
	LOC_Os10g40290.1	pectinacetylesterase domain containing protein
	LOC_Os12g05600.1	hydrolase
	LOC_Os11g04380.1	domain of unknown function
	LOC_Os11g02424.2	LTPL9 - Protease inhibitor/seed storage/LTP family protein precursor
	LOC_Os03g14654.1	LTPL108 - Protease inhibitor/seed storage/LTP family protein precursor
	LOC_Os05g09740.1	HAD superfamily phosphatase
	LOC_Os05g09724.1	HAD superfamily phosphatase
	LOC_Os05g08554.1	expressed protein
	LOC_Os11g42550.1	dirigent
	LOC_Os01g53240.1	BURP domain containing protein
	LOC_Os02g43280.2	aldehyde dehydrogenase
	LOC_Os11g08569.1	cycloartenol synthase
	LOC_Os11g42220.1	laccase precursor protein
	LOC_Os04g55159.1	LTPL125 - Protease inhibitor/seed storage/LTP family protein precursor
	LOC_Os02g11770.1	expressed protein
	LOC_Os07g32620.1	anthocyanidin 5,3-O-glucosyltransferase
	LOC_Os05g04820.1	MYB family transcription factor
	LOC_Os03g61740.1	sex determination protein tasselseed-2
Module 14	LOC_Os12g29400.1	GRAM domain containing protein
	LOC_Os06g35960.1	HSF-type DNA-binding domain containing protein
	LOC_Os05g03920.1	TKL_IRAK_DUF26-lf.3 - DUF26 kinases have homology to DUF26 containing loci
	LOC_Os01g18220.1	expressed protein
	LOC_Os02g47840.1	universal stress protein domain containing protein
	LOC_Os01g57450.1	universal stress protein domain containing protein
	LOC_Os03g17790.1	OsRCI2-5 - Putative low temperature and salt responsive protein
	LOC_Os03g60580.1	actin-depolymerizing factor
	LOC_Os02g43330.1	homeobox associated leucine zipper
	LOC_Os07g05940.1	9-cis-epoxycarotenoid dioxygenase 1
	LOC_Os10g25400.1	GDSL-like lipase/acylhydrolase
	LOC_Os04g59540.1	phosphatidylinositol-4-phosphate 5-Kinase
	LOC_Os01g62610.1	peptidyl-prolyl cis-trans isomerase
	LOC_Os05g11610.1	expressed protein
	LOC_Os06g46740.1	early nodulin 20 precursor
	LOC_Os01g07530.1	uncharacterized glycosyltransferase
	LOC_Os01g32780.1	universal stress protein domain containing protein
	LOC_Os09g15670.1	protein phosphatase 2C
	LOC_Os01g62760.1	protein phosphatase 2C
	LOC_Os05g41490.1	circadian clock coupling factor ZGT
	LOC_Os03g18490.1	RPGR
	LOC_Os10g37660.1	trehalase precursor
	LOC_Os05g11620.1	expressed protein
	LOC_Os10g39110.1	expansin precursor
	LOC_Os01g58850.1	circadian clock coupling factor-related
	LOC_Os08g32060.1	spotted leaf 11
	LOC_Os09g21120.1	armadillo/beta-catenin repeat family protein
	LOC_Os12g08700.1	expressed protein
Module 15	LOC_Os09g29200.1	glutathione S-transferase
	LOC_Os07g41410.1	EGG APPARATUS-1
	LOC_Os12g19470.2	ribulose bisphosphate carboxylase small chain
	LOC_Os01g41810.1	cytochrome P450 72A1
	LOC_Os06g29730.1	RALFL28 - Rapid ALkalinization Factor RALF family protein precursor
	LOC_Os06g39120.1	expressed protein
	LOC_Os09g29540.1	OsWAK82 - OsWAK receptor-like cytoplasmic kinase OsWAK-RLCK
	LOC_Os10g41980.1	RALFL26 - Rapid ALkalinization Factor RALF family protein precursor
	LOC_Os10g34930.1	secretory protein
	LOC_Os12g12090.1	expressed protein
	LOC_Os06g17970.1	NBS-LRR disease resistance protein
	LOC_Os07g28480.1	glutathione S-transferase
	LOC_Os12g41810.1	expressed protein
	LOC_Os09g30454.1	OsWAK87 - OsWAK receptor-like protein kinase
	LOC_Os08g10260.1	NBS-LRR disease resistance protein
	LOC_Os09g27580.2	potassium transporter
	LOC_Os10g38780.1	glutathione S-transferase
	LOC_Os08g26840.1	plant protein of unknown function domain containing protein
	LOC_Os04g29810.1	expressed protein
	LOC_Os04g26920.3	oxidoreductase
	LOC_Os04g29790.1	OsWAK40 - OsWAK receptor-like protein OsWAK-RLP
